# Supplementary material
Source: PubMed Central journal article supplement (PMC3397269)
Supplement: mmc1.pdf [file mmc1.pdf]

## Supplemental Data

### Mutations in *PIGO*, a Member of the GPI-Anchor-Synthesis Pathway, Cause

### Hyperphosphatasia with Mental Retardation

Peter M. Krawitz, Yoshiko Murakami, Jochen Hecht, Ulrike Krüger, Susan E. Holder, Geert R. Mortier, Barbara Delle Chiaie, Elfride De Baere, Miles D. Thompson, Tony Roscioli, Szymon Kielbasa, Taroh Kinoshita, Stefan Mundlos, Peter N. Robinson, and Denise Horn

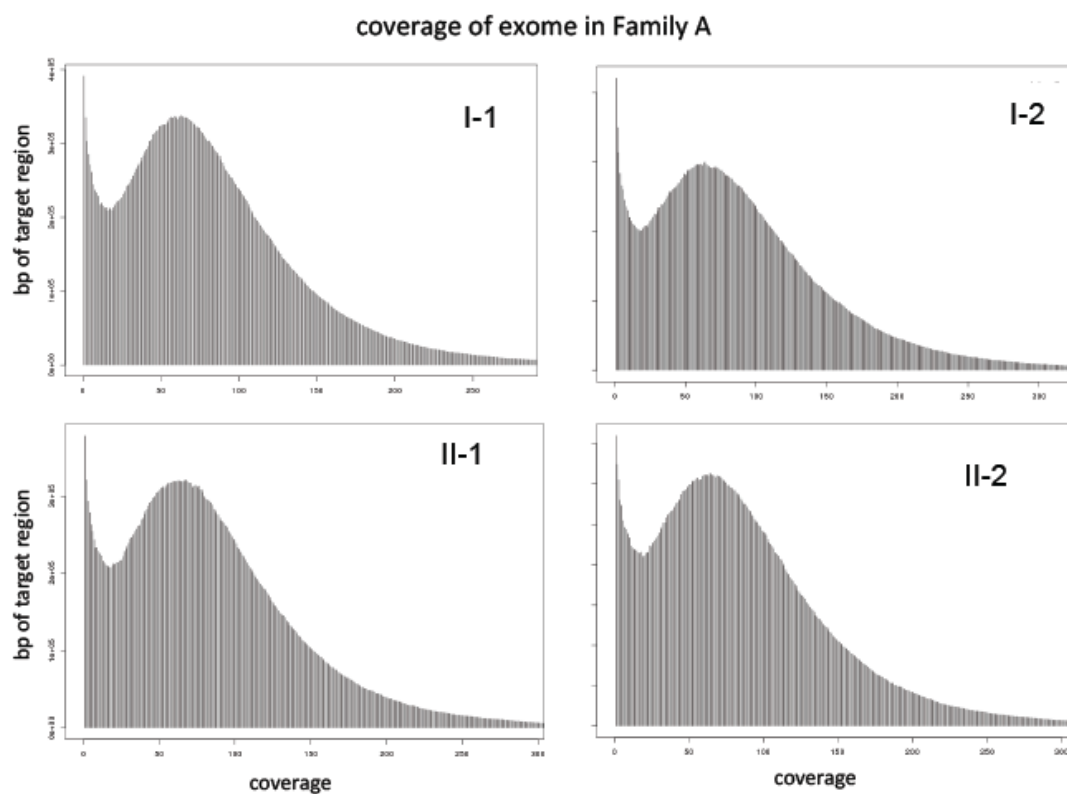

Figure S1. Coverage of Exome Target Region

Over 90% of all CCDS exons were covered by more than 10 reads allowing highly specific variant detection.

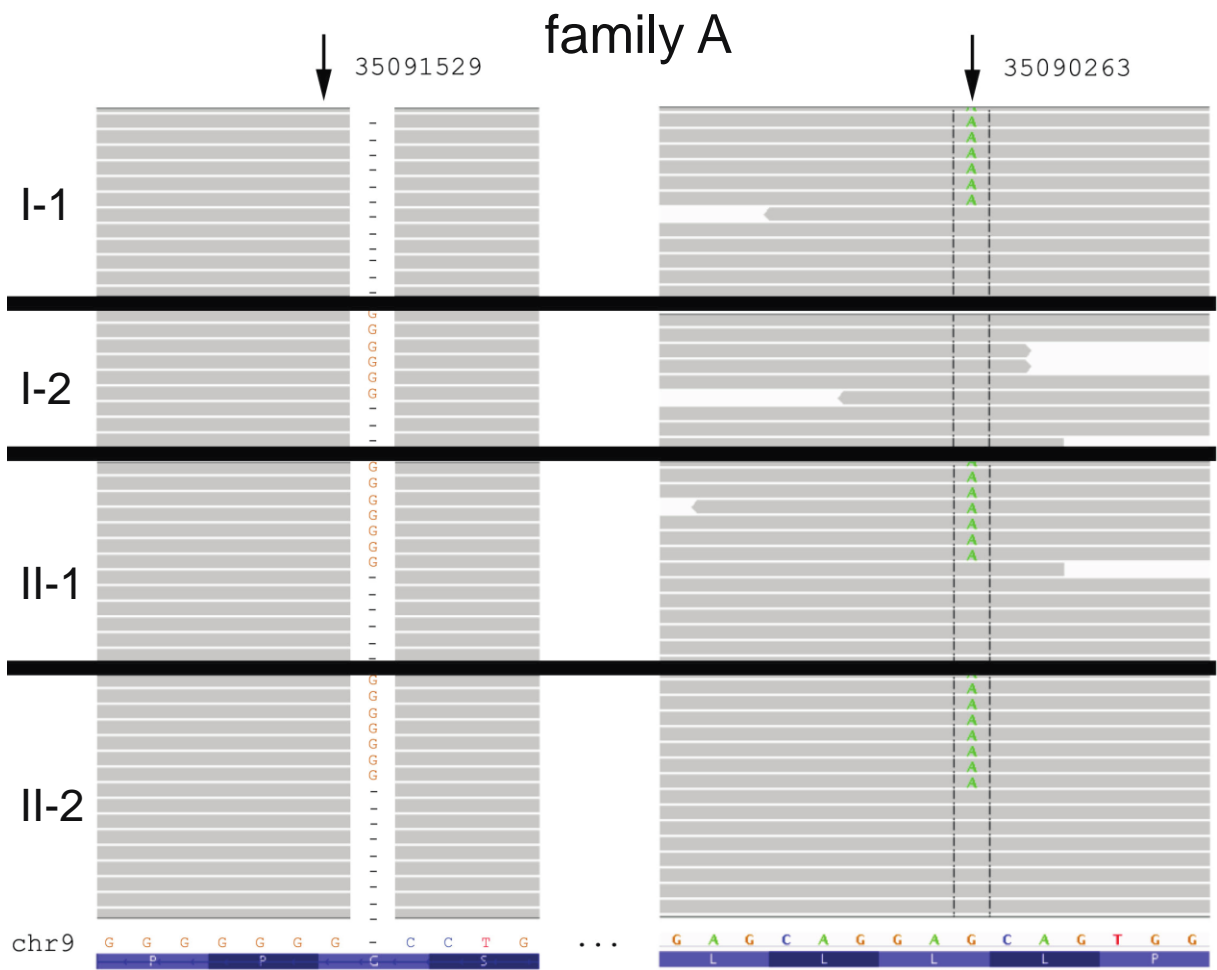

Figure S2. Compound Heterozygous Mutations c.2361dup (left) and c.2869C>T (right) of Family A  
 A snapshot at the respective position in the alignment was taken from the integrative genome viewer.

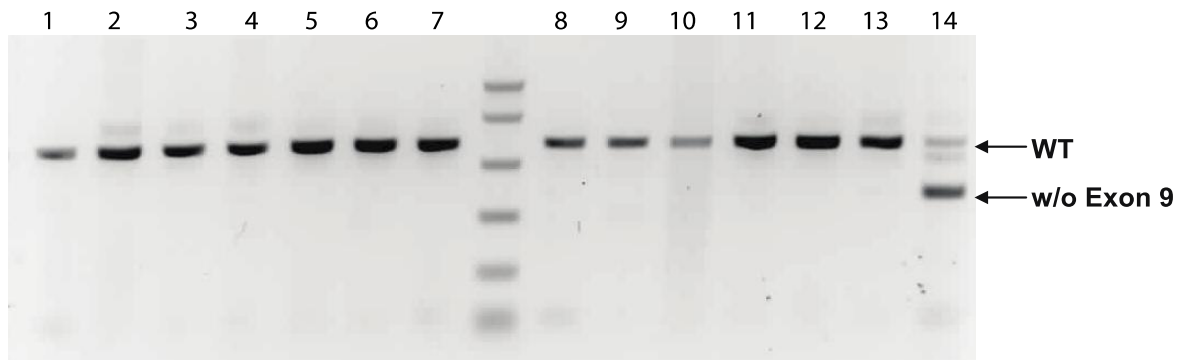

Figure S3. cDNA Controls in Comparison with an Aberrant Splicing Product Due to Skipping of Exon 9

cDNA controls (lane 1-13) in comparison with an aberrant splicing product due to skipping of exon 9 (lane 14 from heterozygous carrier B.I.2). The following primers were used for cDNA-PCR amplification: PIGO\_F7\_FW: 5'- TCCTACATCTGCTTGCTGCTGGG -3' (located in PIGO exon 6) and PIGO\_F7\_RV: 5'- GGAGAAGTCCCACGCTGCTCAC-3' (located in PIGO exon 10). PCR was performed in a total volume of 20  $\mu$ l containing 0.25  $\mu$ M primers (MWG Biotech AG), 300  $\mu$ M dNTPs (Bioline), 2.0  $\mu$ l of 10x PCR Gold buffer (Applied Biosystems), 2.0 mM MgCl<sub>2</sub> (Applied Biosystems), 1,5 U AmpliTaq Gold Polymerase (Applied Biosystems) and 3.0  $\mu$ l cDNA. The GeneAmp PCR System 9700 (Applied Biosystems) was utilized for thermal cycling applying the following thermal conditions: 11 min at 95°C, 35 cycles of 94°C for 30 s, 67,6°C for 30 s and 72°C for 2 min as well as a final elongation step of 72°C for 10 min. Finally, all samples were cooled down to 10°C and thereafter analyzed by agarose gel electrophoresis.

p.Leu957Phe

|                        |                      |
|------------------------|----------------------|
| homo sapiens           | HLLFAVGCPLLLIWPFLCE  |
| mus musculus           | HLLFAVGCPLLLIWPFLCE  |
| rattus norvegicus      | HLLFAVGCPLLLIWPFLCE  |
| canis lupus            | HLLFAVGCPLLLIWPFLCE  |
| bos taurus             | HLLFAVGCPLLLIWPFLCE  |
| loxodonta africana     | HLLFAVGCPLLLIWPFLCE  |
| xenopus laevis         | HILFSAGSSLLLEWPFLLCE |
| danio rerio            | HIIFAVGCPLLLIWPFLVCE |
| sacharomyces cervisiae | HILVSLSVALLTIWSPQPD  |

Figure S4. Alignment of PIGO Sequences from 9 Species

The missense mutation p.L957F affects a highly conserved residue within a transmembrane segment.

Table S1. Summary of Clinical Findings in Patients Carrying *PIGO* and *PIGV* Mutations

|                                                             | HPO ID <sup>a</sup>        | Family A II-1 | Family A II-2 | Family B II-1              | Manifestations of Patients with <i>PIGV</i> Mutations (n = 14) <sup>b</sup> |
|-------------------------------------------------------------|----------------------------|---------------|---------------|----------------------------|-----------------------------------------------------------------------------|
| Sex                                                         |                            | Female        | Female        | Female                     | 9 females, 5 males                                                          |
| Age of last assessment                                      |                            | 15 years      | 12 years      | 20 months                  | 7 months - 17 years                                                         |
| Origin                                                      |                            | White British | White British | White                      | German, Maroccan, Dutch, Polish, British, Caucasian-American                |
| Height (SD)                                                 |                            | -4.2          | -1.4          | -2.5                       | Normal in 13/14                                                             |
| Weight (SD)                                                 |                            | -1.5          | +0.6          | -3.3                       | Normal in 13/14                                                             |
| OFC (SD)                                                    |                            | -0.2          | +0.7          | -5.5                       | Normal in 12/14                                                             |
| Hyperphosphatasia <sup>c</sup>                              | HP:0003155                 | +             | +             | +                          | 14/14                                                                       |
| Global developmental delay                                  | HP:0001263                 | +             | +             | +                          | 14/14                                                                       |
| Age at walking                                              |                            | 5 years       | 2 years       | No walking                 | Delayed                                                                     |
| Delayed speech and language development                     | HP:0000750                 | +             | +             | Absent speech (HP:0001344) | 14/14                                                                       |
| Muscular hypotonia                                          | HP:0001252                 | +             | Mild          | +                          | 11/12                                                                       |
| Seizures                                                    | HP:0001250                 | -             | -             | +                          | 9/12                                                                        |
| Facial gestalt <sup>a</sup>                                 |                            |               |               |                            |                                                                             |
| Apparent hypertelorism                                      | HP:0000316                 | +             | +             | +                          | +                                                                           |
| Long palpebral fissures                                     | HP:0000637                 | +             | +             | +                          | +                                                                           |
| Broad nasal bridge                                          | HP: 0000431                | +             | +             | +                          | +                                                                           |
| Broad nasal tip                                             | HP:0000455                 | +             | +             | +                          | +                                                                           |
| Tented upper lip vermillion                                 | HP:0010804                 | +             | +             | +                          | +                                                                           |
| Brachytelephalangy <sup>a</sup>                             | HP:0009882                 | +             | +             | +                          | 14/14                                                                       |
| Analrectal abnormalites/constipation                        | HP:0002025 (anal stenosis) | +             | +             | +                          | 6/12                                                                        |
| Aganglionic megacolon                                       | HP:0002251                 | -             | +             | -                          | 2/14                                                                        |
| Atrial septal defect                                        | HP:0001631                 | -             | -             | +                          | 1/14                                                                        |
| Vesicoureteral reflux (requiring reimplantation of ureters) | HP:0000076                 | +             | -             | -                          | -                                                                           |
| Atonic bladder                                              | -                          | -             | +             | -                          | -                                                                           |
| Peripheral pulmonary stenosis                               | HP:0004957                 | -             | -             | +                          | -                                                                           |
| Left coronal synostosis                                     | -                          | -             | -             | +                          | -                                                                           |

<sup>a</sup>Human Phenotype Ontology with term identification (ID).

<sup>b</sup>Not all features were documented in the reported patients.

<sup>c</sup>Consistent features in bold.

Table S2. Summary of Computational Variant Filtering in Family A

| Filter                                                      | II1   | II2   | I1    | I2    |
|-------------------------------------------------------------|-------|-------|-------|-------|
| Sequence variants in CCDS                                   | 22395 | 22137 | 22299 | 22078 |
| Rare variants (not in dbSNP 132)                            | 853   | 879   | 887   | 842   |
| Missense, nonsense, frame shifting or splice site affecting | 427   | 440   | 434   | 416   |
| Candidate genes with homozygous mutations                   | 0     |       |       |       |
| Candidate genes with compound heterozygous mutations        | 1     |       |       |       |

The total number of single-nucleotide variants (SNV) and short indels (<20bp). These were further filtered to rare variants not present in dbSNP 132 or in the 1000 genomes project, and finally to variants that are nonsynonymous. Candidate genes were filtered assuming a recessive mode of inheritance. Genes were analyzed for variants that were homozygous in both patients and heterozygous in the parents or for genes with compound heterozygous variants in both patients whereby each of the parents was heterozygous for a different variant.

Table S3. Coordinates of Detected Mutations with Respect to Genome Sequence, Coding Sequence, and Protein Sequence

| Genomic (hg19)    | Transcript (NM_032634) | Protein (NP_116023) |
|-------------------|------------------------|---------------------|
| chr9:35090058C>T  | c.3069+5G>A            | –                   |
| chr9:35090263G>A  | c.2869C>T              | p.Phe957Leu         |
| chr9:35091522T>TG | c.2361dupC             | p.Thr788Hisfs*      |
